# Supplementary material for: Ir-Doped Co(OH)2 nanosheets as an efficient electrocatalyst for the oxygen evolution reaction
Source: Royal Society of Chemistry journal article supplement (doi:10.1039/d2dt01366e), 2022-01-01
Supplement: d2dt01366e1.pdf [file d2dt01366e1.pdf]

## Ir-doped $\text{Co}(\text{OH})_2$ Nanosheets as Efficient Electrocatalyst for Oxygen Evolution Reaction

Yihao Gao,<sup>a</sup> Jie Bai,<sup>a</sup> Tianning Zhou,<sup>a</sup> Yaqiong Gong,<sup>a\*</sup>

<sup>a</sup> School of Chemical Engineering and Technology, North University of China,  
Taiyuan, Shanxi 030051

\* Corresponding author: Yaqiong Gong: gyq@nuc.edu.cn

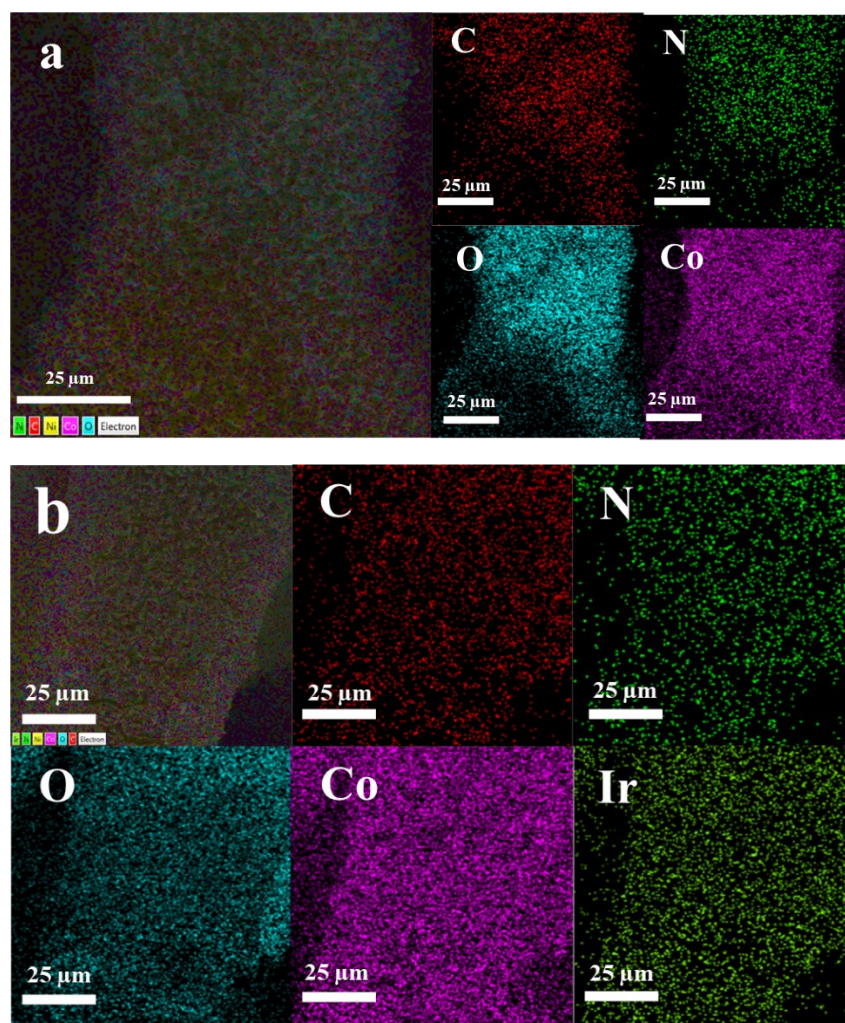

Fig. S1 SEM-EDS mapping images (a and b) of  $\text{Co}(\text{OH})_2@ZIF-67/NF$  and  $\text{Ir-Co}(\text{OH})_2@ZIF-67/NF$ .

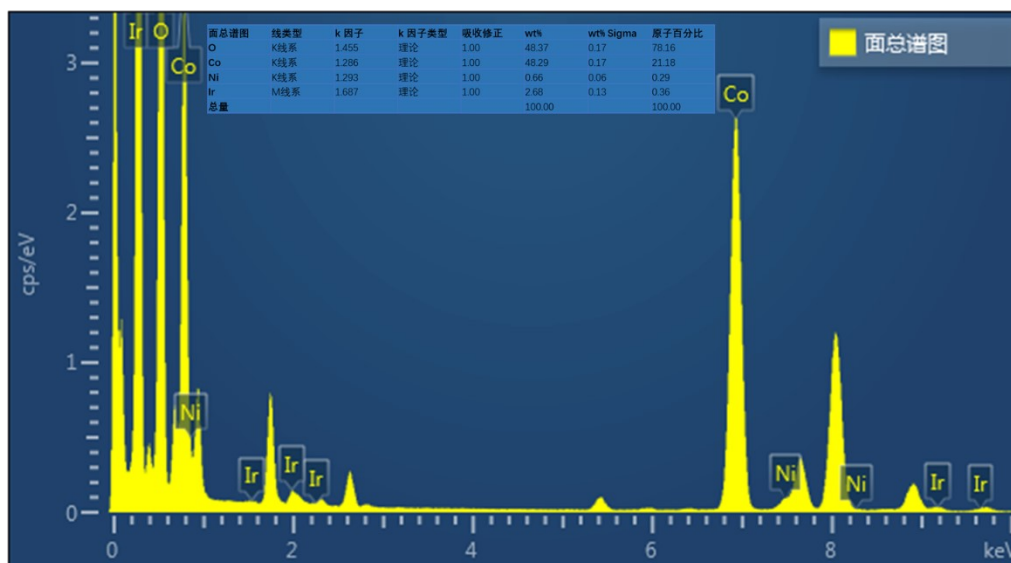

Fig. S2 TEM-EDS spectrum

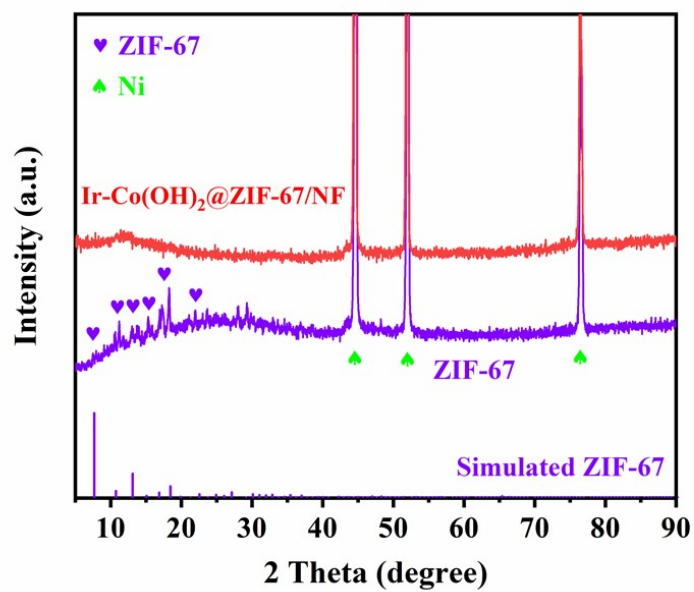

Fig. S3 X-ray diffraction patterns for ZIF-67/NF and Ir-Co(OH)<sub>2</sub>@ZIF-67/NF

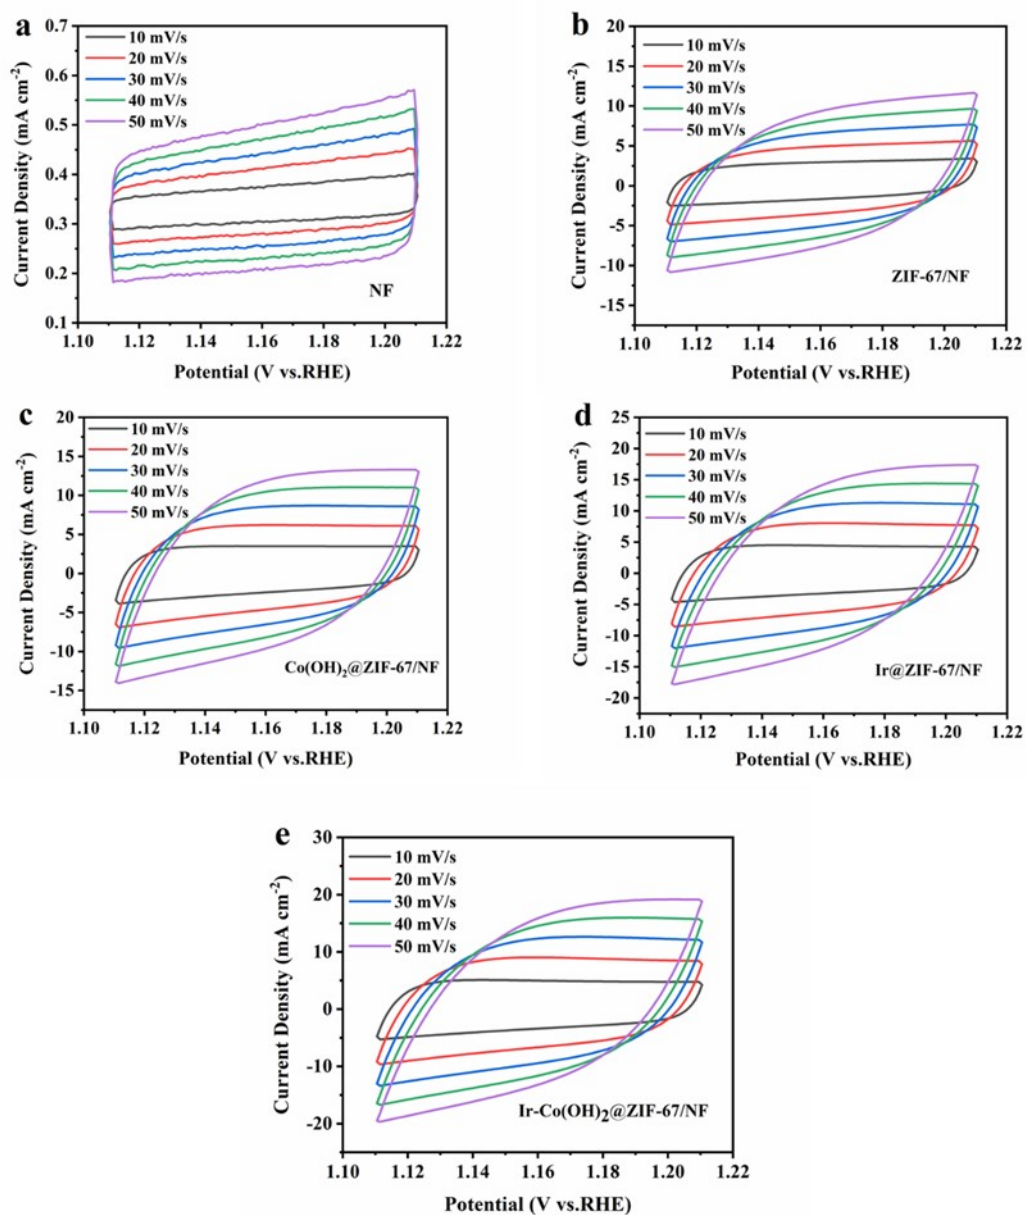

Fig. S4 Cyclic voltammograms (CV) of (a) NF, (b) ZIF-67/NF, (c) Co(OH)<sub>2</sub>@ZIF-67/NF, (d) Ir@ZIF-67/NF, and (e) Ir-Co(OH)<sub>2</sub>@ZIF-67/NF electrodes recorded in the non-Faradaic potential region (1.11 - 1.21 V vs. RHE) at different scan rates (10, 20, 30, 40, and 50 mV/s) toward OER in 1 M KOH.

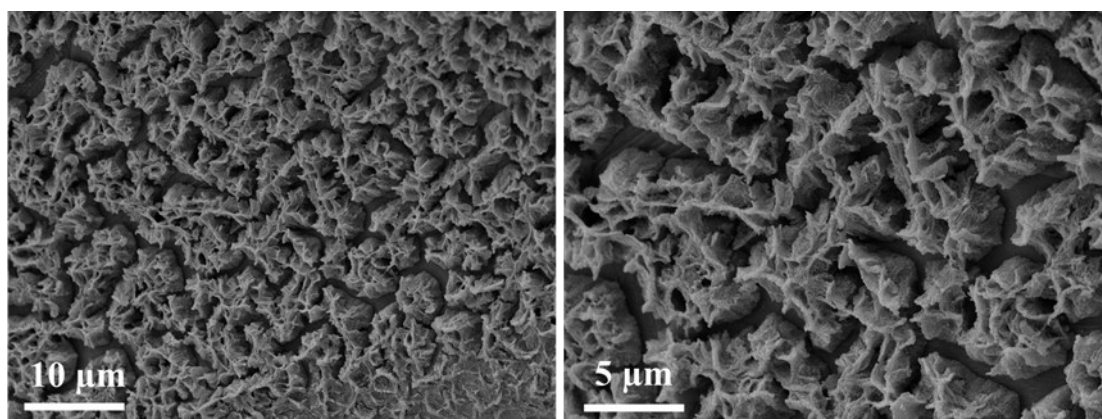

Fig. S5 SEM images after the stability test of Ir-Co(OH)<sub>2</sub>@ZIF-67/NF

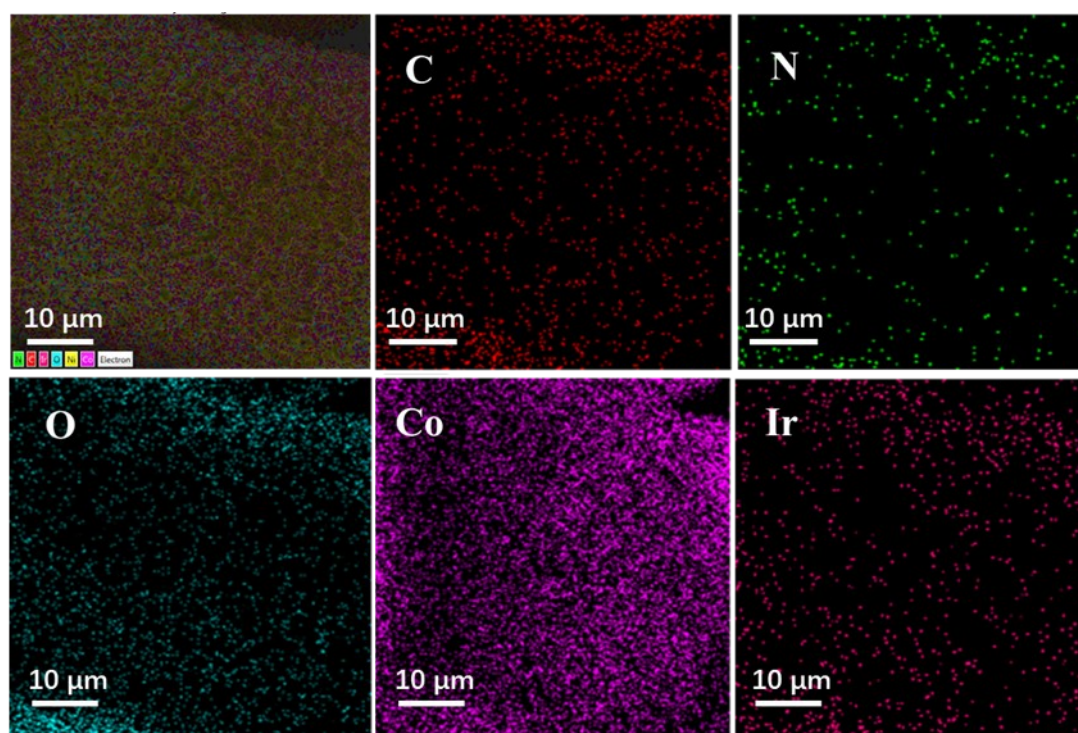

Fig. S6 SEM-EDS mapping images after the stability test of Ir-Co(OH)<sub>2</sub>@ZIF-67/NF.

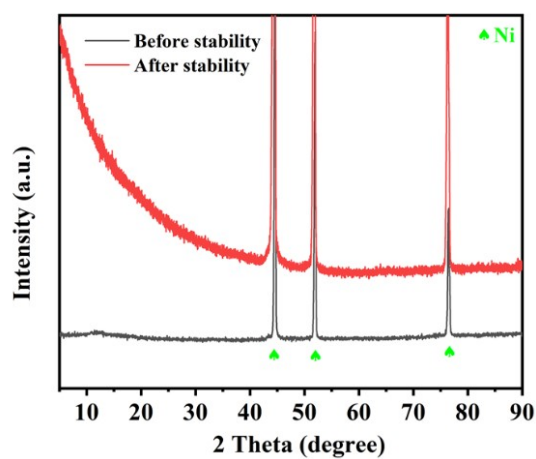

Fig. S7 Comparison of X-ray diffraction patterns before and after stability test of

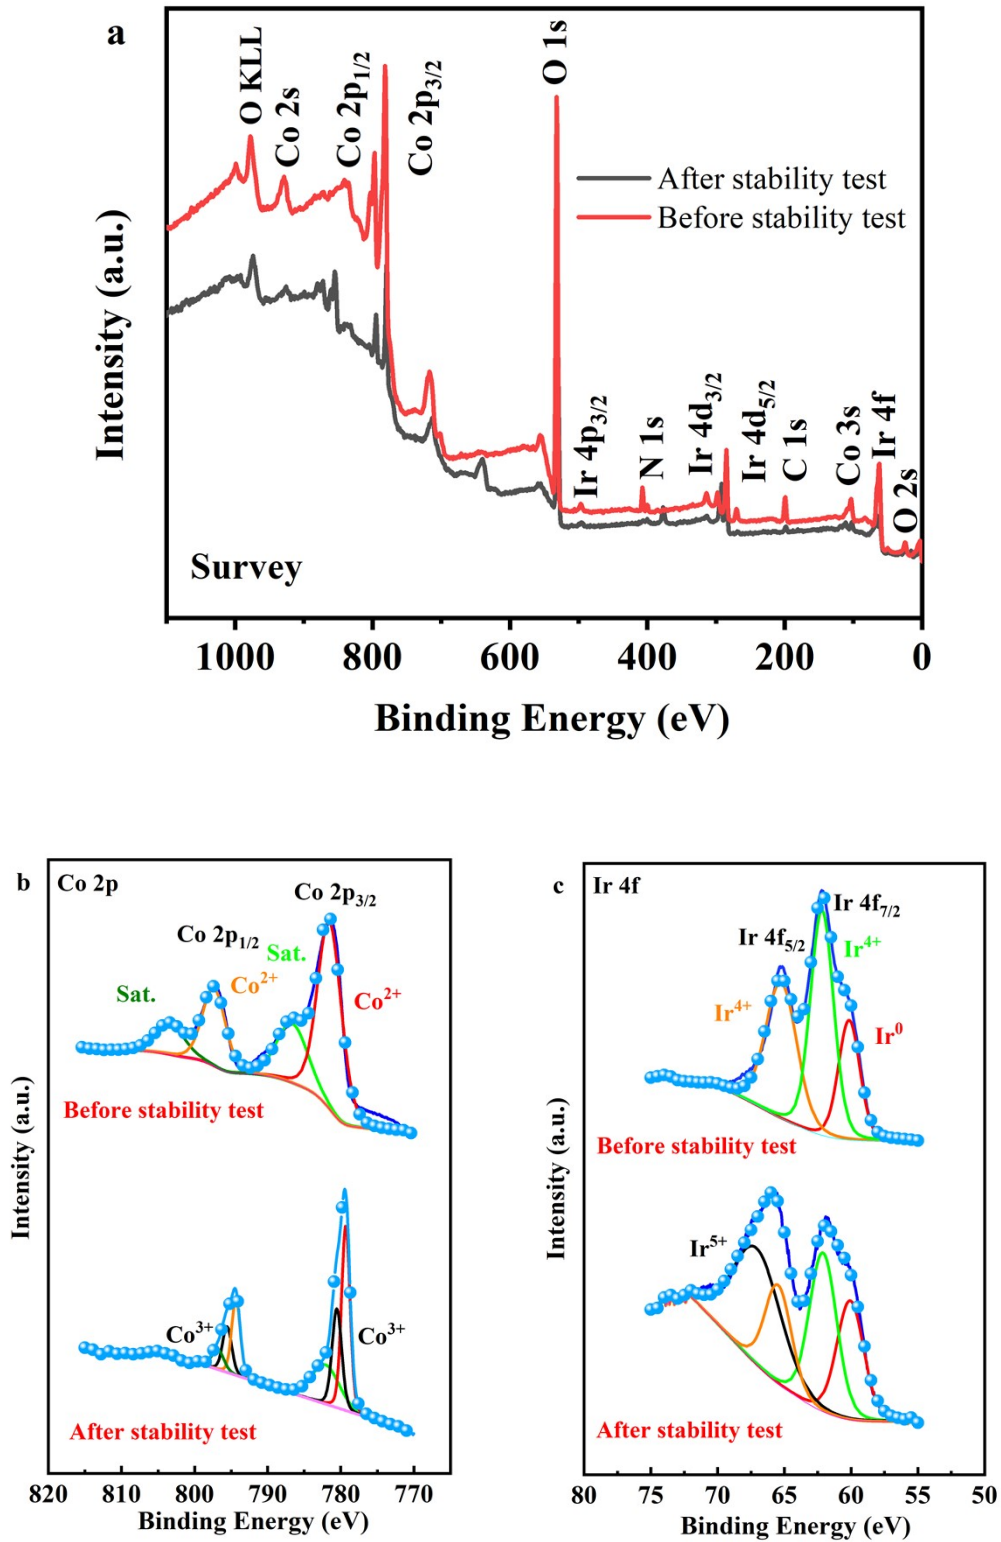

Fig. S8 Comparison of XPS spectra before and after stability test, (a) survey, (b) Co 2p, (c) Ir 4f

Table. S1 A performance comparison of Ir-Co(OH)<sub>2</sub>@ZIF-67/NF to reported OER electrocatalysts in 1 M KOH recently.

| Catalyst                                                                                                                     | $\eta_{10}$ (mV) | Reference                                             |
|------------------------------------------------------------------------------------------------------------------------------|------------------|-------------------------------------------------------|
| <b>Ir-Co(OH)<sub>2</sub>@ZIF-67/NF</b>                                                                                       | <b>198</b>       | <b>This work</b>                                      |
| Ir-Ni(OH) <sub>2</sub> nanocages                                                                                             | 248              | Chemical Engineering Journal<br>2022, 429, 132478     |
| Ba <sub>0.9</sub> Sr <sub>0.1</sub> Co <sub>0.8</sub> Fe <sub>0.1</sub> Ir <sub>0.1</sub> O <sub>3-<math>\delta</math></sub> | 300              | ACS Appl. Energy Mater.<br>2020, 3, 7149-7158.        |
| Ir-Co(OH) <sub>2</sub> nanosheets                                                                                            | 262              | Dalton Trans., 2022, Advance<br>Article.              |
| IrO <sub>2</sub> @MTO-S                                                                                                      | 240              | ChemCatChem,<br>2019, 11, 583-592.                    |
| Ir@NG-750                                                                                                                    | 273              | J. Mater. Chem. A,<br>2020, 8, 19665-19673.           |
| Ir/Ni Oxide                                                                                                                  | 264              | ACS Appl. Mater. Interfaces,<br>2016, 8, 15985-15990. |
| Co@Ir/NC-x                                                                                                                   | 280              | ACS Sustainable Chem. Eng.,<br>2018, 6, 5105-5114.    |
| IrO <sub>2</sub> @Ir-MOF                                                                                                     | 207              | J. Mater. Chem. A,<br>2020, 8, 25687-25695.           |
| Cry-Ir                                                                                                                       | 340              | J. Mater. Chem. A,<br>2016, 4, 12561.                 |
| Ir-doped NiCo <sub>2</sub> O <sub>4</sub><br>Nanostructure                                                                   | 303              | Applied Catalysis A: General,<br>2021, 626, 118377.   |

Table. S2 Fitting parameters of Nyquist plots.

| Catalyst                               | $R_{ct}/\Omega$ |
|----------------------------------------|-----------------|
| ZIF-67/NF                              | 7.547           |
| Co(OH) <sub>2</sub> @ZIF-67/NF         | 6.6             |
| Ir@ZIF-67/NF                           | 3.431           |
| <b>Ir-Co(OH)<sub>2</sub>@ZIF-67/NF</b> | <b>2.588</b>    |
| NF                                     | 15.36           |
